# Supplementary material for: Using high resolution electronic spectroscopy to probe the effects of ring twist on charge transfer in 2-phenylindole and N-phenylcarbazole
Source: Royal Society of Chemistry journal article supplement (doi:10.1039/c3cp51403j), 2013-01-01
Supplement: c3cp51403j.pdf [file c3cp51403j.pdf]

## Supplementary Information.

### Microwave spectrum of 2-phenylindole (PI).

Figure S-1 shows a typical segment of the pure rotational spectrum of PI. The *a*-type transitions were the most intense ones owing to the higher dipole moment along this axis; the *b*-type transitions required a larger number of accumulations. 13 <sup>a</sup>R- and 5 <sup>b</sup>R-type transitions were assigned using jb95 (see Table S-1). Only the <sup>b</sup>R-type transitions showed a <sup>14</sup>N quadrupole splitting pattern. Unfortunately, the quadrupole splitting of the *a*-type signals was too small to be resolved. Thus, the quadrupole constants were set equal to their theoretical values in the final fit of all the data (Table S-2).

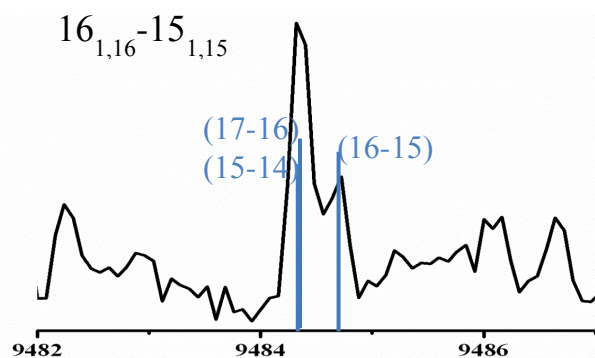

**Figure S-1.**  $16_{1,16}$ - $15_{1,15}$  rotational transition of 2-phenylindole. The black trace shows the experimental lines, while the blue bars show the predicted <sup>14</sup>N quadrupole splitting. The hyperfine components are labeled by the quantum number *F*.

**Table S-1.** Assigned transitions of 2-phenylindole.

| Transition                                    | Observed (MHz) | Calculated (MHz) | Obs-calc (MHz) |
|-----------------------------------------------|----------------|------------------|----------------|
| 12 <sub>111</sub> - 11 <sub>110</sub> (13-12) | 6919.60        | 6919.51          | 0.08           |
| 13 <sub>013</sub> - 12 <sub>012</sub> (14-13) | 7207.05        | 7207.05          | 0.00           |
| 13 <sub>211</sub> - 12 <sub>210</sub> (14-13) | 7422.80        | 7422.84          | -0.04          |
| 13 <sub>112</sub> - 12 <sub>111</sub> (14-13) | 7490.30        | 7490.29          | 0.01           |
| 14 <sub>114</sub> - 13 <sub>113</sub> (15-14) | 7638.50        | 7638.46          | 0.04           |
| 14 <sub>014</sub> - 13 <sub>013</sub> (15-14) | 7744.70        | 7744.71          | -0.01          |
| 12 <sub>112</sub> - 11 <sub>011</sub> (13-12) | 7748.94        | 7748.95          | -0.01          |
| 12 <sub>112</sub> - 11 <sub>011</sub> (12-11) | 7749.49        | 7749.45          | 0.04           |
| 14 <sub>212</sub> - 13 <sub>211</sub> (15-14) | 8006.80        | 8006.79          | 0.01           |
| 15 <sub>115</sub> - 14 <sub>114</sub> (16-15) | 8179.40        | 8179.38          | 0.01           |
| 15 <sub>015</sub> - 14 <sub>014</sub> (16-15) | 8280.16        | 8280.16          | 0.00           |
| 15 <sub>213</sub> - 14 <sub>212</sub> (16-15) | 8592.00        | 8592.09          | -0.09          |
| 14 <sub>114</sub> - 13 <sub>013</sub> (15-14) | 8610.20        | 8610.26          | -0.06          |
| 16 <sub>116</sub> - 15 <sub>115</sub> (17-16) | 8719.60        | 8719.60          | 0.00           |
| 15 <sub>115</sub> - 14 <sub>014</sub> (16-15) | 9044.99        | 9044.94          | 0.05           |
| 15 <sub>115</sub> - 14 <sub>014</sub> (15-14) | 9045.32        | 9045.31          | 0.01           |
| 16 <sub>214</sub> - 15 <sub>213</sub> (17-15) | 9178.40        | 9178.33          | 0.07           |
| 16 <sub>116</sub> - 15 <sub>015</sub> (17-16) | 9484.39        | 9484.38          | 0.01           |
| 16 <sub>116</sub> - 15 <sub>015</sub> (16-15) | 9484.70        | 9484.71          | -0.01          |
| 17 <sub>215</sub> - 16 <sub>214</sub> (18-17) | 9765.00        | 9765.04          | -0.04          |
| 17 <sub>117</sub> - 16 <sub>016</sub> (18-17) | 9929.74        | 9929.74          | 0.00           |
| 17 <sub>117</sub> - 16 <sub>016</sub> (17-16) | 9929.99        | 9930.03          | -0.04          |

**Table S-2.** Rotational parameters of 2-phenylindole in its ground electronic state.

| <b>Parameters</b> | <b>Experiment</b>   | <b>Theory<sup>a</sup></b> |
|-------------------|---------------------|---------------------------|
| A (MHz)           | 2305.270(56)        | 2318                      |
| B (MHz)           | 297.15977(80)       | 298                       |
| C (MHz)           | 266.31594(71)       | 268                       |
| $\mu_a$ (D)       | -                   | 1.6                       |
| $\mu_b$ (D)       | -                   | 1.2                       |
| $\chi_{aa}$ (MHz) | [1.64] <sup>b</sup> | 1.64                      |
| $\chi_{bb}$ (MHz) | [1.35]              | 1.35                      |
| $\chi_{cc}$ (MHz) | [-2.99]             | -2.99                     |

<sup>a</sup> Calculated using Gaussian03 (M052x/6-311++g(d,p)). <sup>b</sup> Parameters fixed in the fit.
